# Supplementary material for: Identification and Analysis of Long Non-coding RNAs and mRNAs in Chicken Macrophages Infected with Avian Infectious Bronchitis Coronavirus
Source: Research Square preprint supplement (doi:10.21203/rs.3.rs-58800/v2), 2020-12-02
Supplement: Supplementary file 1 [file 01d79411298483eb67f1c49e.xlsx]

## Sheet: Sheet1
down lncRNA id	foldChange		up lncRNA id	foldChange
MSTRG.8180.7	0		MSTRG.21445.2	823.812
MSTRG.2137.5	0		MSTRG.22512.1	Inf
MSTRG.17146.20	0.00190478		MSTRG.3682.1	Inf
MSTRG.6458.12	0		MSTRG.16988.1	Inf
MSTRG.15811.5	0		ENSGALT00000094989	Inf
MSTRG.14220.1	0.0122262		MSTRG.25363.6	Inf
MSTRG.2137.7	0		MSTRG.850.1	Inf
MSTRG.11436.3	0		MSTRG.9359.1	223.662
MSTRG.9359.3	0		MSTRG.16758.6	Inf
ENSGALT00000107274	0		MSTRG.3294.1	Inf
MSTRG.2137.17	0		MSTRG.12602.4	Inf
MSTRG.6458.14	0.00364387		MSTRG.7587.15	5514.62
MSTRG.26120.58	0.000953941		MSTRG.1579.4	Inf
MSTRG.3559.1	0		ENSGALT00000107809	155.992
MSTRG.2137.11	0.00722296		ENSGALT00000093536	Inf
MSTRG.6458.9	0.00224741		MSTRG.21635.1	28.2776
MSTRG.27094.4	0.020006		MSTRG.7587.28	1129.7
MSTRG.25256.5	0.0111718		ENSGALT00000104335	122.122
MSTRG.43.2	0		MSTRG.9426.1	27.635
ENSGALT00000102136	0		MSTRG.25441.2	75.2598
MSTRG.7587.19	0.03164		MSTRG.7587.34	Inf
MSTRG.25413.64	0.00648973		MSTRG.10484.8	Inf
MSTRG.25416.74	0.016369		MSTRG.14220.9	1299.64
MSTRG.2137.20	0.0169922		MSTRG.15550.10	Inf
ENSGALT00000091177	0		MSTRG.4755.14	Inf
ENSGALT00000100943	0		MSTRG.43.3	Inf
MSTRG.10068.9	0.0455251		MSTRG.13503.2	Inf
MSTRG.25099.1	0.0417109		MSTRG.7526.2	17.315
MSTRG.26120.13	0		MSTRG.20533.5	Inf
MSTRG.2137.28	0.0659874		MSTRG.2850.6	Inf
ENSGALT00000096828	0		MSTRG.10484.7	Inf
MSTRG.6458.8	0		MSTRG.4074.5	Inf
MSTRG.25416.43	0.0282226		MSTRG.10484.9	Inf
MSTRG.15457.2	0.035519		MSTRG.8520.2	Inf
MSTRG.7525.3	0.00033665		MSTRG.2517.18	4477.14
MSTRG.25240.2	0		MSTRG.11437.17	Inf
MSTRG.2424.5	0		MSTRG.2394.8	Inf
MSTRG.7587.32	5.75577e-06		MSTRG.25413.57	Inf
MSTRG.25092.7	0.00176979		MSTRG.13834.4	Inf
MSTRG.13228.13	0.0638532		MSTRG.16094.3	Inf
MSTRG.2137.2	0.117175		MSTRG.39.6	Inf
MSTRG.1846.4	0		MSTRG.25436.3	Inf
MSTRG.25142.1	0		MSTRG.21569.2	14.6982
MSTRG.12602.1	0.0217329		MSTRG.8517.2	90.7727
MSTRG.25401.2	0		MSTRG.39.7	Inf
MSTRG.25312.11	0		MSTRG.4074.6	Inf
MSTRG.25142.5	0		ENSGALT00000091386	Inf
MSTRG.25092.8	0.115239		MSTRG.43.4	Inf
MSTRG.25452.1	0.0636154		MSTRG.22271.3	4.77069
MSTRG.6458.56	0.131731		MSTRG.26120.19	Inf
MSTRG.2137.3	0.121684		MSTRG.12803.9	Inf
MSTRG.2137.14	0.122577		ENSGALT00000101150	Inf
MSTRG.2137.15	0.106661		MSTRG.24743.3	5.09463
MSTRG.25079.2	0		MSTRG.13333.1	Inf
MSTRG.3765.1	0.00878257		MSTRG.19505.3	Inf
MSTRG.1106.1	0		MSTRG.15141.2	519.983
MSTRG.2137.13	0.158286		MSTRG.4074.4	Inf
MSTRG.10068.2	0		MSTRG.25441.1	10.5068
MSTRG.2137.19	0.0923073		MSTRG.25092.23	Inf
ENSGALT00000094718	0.0050894
ENSGALT00000095670	0.00519482
MSTRG.2137.1	0.160454
MSTRG.25142.6	0
MSTRG.6458.2	0
MSTRG.6458.16	0.14174
MSTRG.17935.12	0
MSTRG.17205.2	0.00930673
MSTRG.2824.2	0
MSTRG.2137.23	0.0922675
MSTRG.25142.11	0
MSTRG.6458.46	0.130824
ENSGALT00000106163	0
MSTRG.17501.3	0.0236215
MSTRG.7594.6	0
MSTRG.7525.5	0.0543248
MSTRG.25363.4	0
MSTRG.25312.38	0.0163719
MSTRG.24258.1	0.00830031
MSTRG.6458.1	0
ENSGALT00000102037	0.0215423
MSTRG.6458.11	0.172792
MSTRG.8519.2	0
MSTRG.6458.15	0
MSTRG.2137.6	0.16522
MSTRG.2137.12	0.134746
MSTRG.2137.9	0.115508
MSTRG.13852.3	0.0439716
MSTRG.7525.1	0.189501
MSTRG.17028.2	0.0182844
MSTRG.6458.31	0.203843
MSTRG.6458.29	0.124407
MSTRG.134.2	0
MSTRG.7525.7	0.109178
MSTRG.10484.1	0
MSTRG.11437.13	0.000421544
MSTRG.6458.18	0
MSTRG.17535.10	0
MSTRG.25373.1	0.00054362
MSTRG.25142.12	0
MSTRG.6458.17	0.181951
MSTRG.6458.19	0.052758
MSTRG.25416.41	0
MSTRG.25092.11	0
MSTRG.17307.22	0
MSTRG.993.3	0
MSTRG.6458.47	0
MSTRG.17501.1	0.2057
MSTRG.7525.9	0.142878
MSTRG.15649.6	0
MSTRG.993.2	0
MSTRG.6458.51	0.0710763
MSTRG.25354.1	0.00307289
MSTRG.3294.3	0
MSTRG.17028.3	0
MSTRG.5498.1	0
MSTRG.6458.22	0.186226
MSTRG.17145.106	0.0585284
MSTRG.25416.75	0
MSTRG.25463.3	0
MSTRG.6458.23	0.19884
MSTRG.25142.10	0
ENSGALT00000075576	0
