# Supplementary material for: Identification and Analysis of Long Non-coding RNAs and mRNAs in Chicken Macrophages Infected with Avian Infectious Bronchitis Coronavirus
Source: Research Square preprint supplement (doi:10.21203/rs.3.rs-58800/v2), 2020-12-02
Supplement: Supplementary file 2 [file 7ccc8b02d7f20f693d309402.xlsx]

## Sheet: Sheet1
down mRNA id	foldChange		up mRNA id	foldChange
ENSGALG00000021399	0.411161		ENSGALG00000024272	3.3909
ENSGALG00000026553	0.39813		ENSGALG00000010721	2.95926
ENSGALG00000010397	0.403225		ENSGALG00000043027	2.1901
ENSGALG00000027353	0.355456		ENSGALG00000006565	2.00397
ENSGALG00000008638	0.461955		ENSGALG00000004196	3.4773
ENSGALG00000005257	0.488214		ENSGALG00000025945	5.27297
ENSGALG00000037437	0.455535		ENSGALG00000029799	2.80216
ENSGALG00000037901	0.465015		ENSGALG00000016919	2.03286
ENSGALG00000009870	0.494249		ENSGALG00000004449	2.41366
ENSGALG00000046212	0.494828		ENSGALG00000044780	4.00826
ENSGALG00000011468	0.0304352		ENSGALG00000013723	2.70943
ENSGALG00000055022	0.372013		ENSGALG00000052643	2.2771
ENSGALG00000052499	0.117857		ENSGALG00000040549	2.0963
ENSGALG00000016288	0.232		ENSGALG00000014182	2.10179
ENSGALG00000031786	0.378901		ENSGALG00000016448	2.85915
ENSGALG00000009909	0.465158		ENSGALG00000015324	3.29989
ENSGALG00000043460	0.353068		ENSGALG00000042607	Inf
ENSGALG00000011200	0.145722		ENSGALG00000009680	2.31077
ENSGALG00000013253	0.441533		ENSGALG00000040847	3.80078
ENSGALG00000001592	0		ENSGALG00000026098	2.11189
ENSGALG00000029203	0		ENSGALG00000019552	3.10539
ENSGALG00000048020	0.35832		ENSGALG00000008442	4.22889
ENSGALG00000035584	0.331358		ENSGALG00000010448	2.33142
ENSGALG00000047525	0.408684		ENSGALG00000052971	2.18702
ENSGALG00000007620	0.146014		ENSGALG00000002645	5.27125
ENSGALG00000050668	0.375799		ENSGALG00000045949	2.7383
ENSGALG00000028659	0.21223		ENSGALG00000035049	2.0789
ENSGALG00000015058	0.31226		ENSGALG00000002086	2.07857
ENSGALG00000004538	0.474302		ENSGALG00000023936	2.01463
ENSGALG00000004103	0.467452		ENSGALG00000016498	14.3942
ENSGALG00000032750	0.434583		ENSGALG00000011721	3.30219
ENSGALG00000009007	0.427533		ENSGALG00000011796	2.11161
ENSGALG00000005679	0.110881		ENSGALG00000012416	4.37877
ENSGALG00000023824	0.258266		ENSGALG00000006064	4.48796
ENSGALG00000016176	0.425471		ENSGALG00000051622	4.91828
ENSGALG00000037164	0.241546		ENSGALG00000016142	2.30552
ENSGALG00000051085	0.270472		ENSGALG00000008546	2.67044
ENSGALG00000009006	0.210157		ENSGALG00000008055	3.35189
ENSGALG00000006322	0.213207		ENSGALG00000047439	2.6487
ENSGALG00000040478	0.284281		ENSGALG00000053868	2.10167
ENSGALG00000015216	0.481833		ENSGALG00000019843	Inf
ENSGALG00000034025	0.262442		ENSGALG00000036160	3.24512
ENSGALG00000005584	0.328601		ENSGALG00000039254	2.69989
ENSGALG00000002048	0.465453		ENSGALG00000008332	Inf
ENSGALG00000016227	0.383875		ENSGALG00000007140	2.5895
ENSGALG00000002643	0.226929		ENSGALG00000045251	3.63741
ENSGALG00000046823	0.283002		ENSGALG00000001369	5.00276
			ENSGALG00000011136	2.2707
			ENSGALG00000039219	2.13244
			ENSGALG00000007539	4.69477
			ENSGALG00000027269	2.67502
			ENSGALG00000046261	2.73223
			ENSGALG00000053279	Inf
			ENSGALG00000014699	10.5658
			ENSGALG00000030613	3.21134
			ENSGALG00000010950	10.3977
			ENSGALG00000009606	2.10938
			ENSGALG00000052408	7.4789
			ENSGALG00000043623	2.08074
			ENSGALG00000013594	2.35984
			ENSGALG00000035879	2.23831
			ENSGALG00000040079	2.29675
			ENSGALG00000047761	Inf
			ENSGALG00000011802	2.62177
			ENSGALG00000042001	2.00994
			ENSGALG00000006018	6.18697
			ENSGALG00000005458	6.83813
			ENSGALG00000040264	2.72947
			ENSGALG00000003952	2.37569
			ENSGALG00000011727	4.28347
			ENSGALG00000041909	2.30877
			ENSGALG00000008018	2.85458
			ENSGALG00000042419	2.17979
			ENSGALG00000004120	4.78867
			ENSGALG00000051731	2.70091
			ENSGALG00000009864	2.29065
			ENSGALG00000039320	3.13478
			ENSGALG00000030886	6.30574
			ENSGALG00000026207	6.22726
			ENSGALG00000047029	13.5848
			ENSGALG00000022704	5.26718
			ENSGALG00000016581	2.34955
			ENSGALG00000048315	Inf
			ENSGALG00000027423	Inf
			ENSGALG00000009034	2.92844
			ENSGALG00000003648	2.34335
			ENSGALG00000006653	2.57704
			ENSGALG00000008037	2.5898
			ENSGALG00000047814	2.27522
			ENSGALG00000006072	19.8703
			ENSGALG00000011635	2.37093
			ENSGALG00000010738	10.5402
			ENSGALG00000054831	Inf
			ENSGALG00000038520	Inf
			ENSGALG00000018874	2.78093
			ENSGALG00000001130	2.15528
			ENSGALG00000007961	2.76307
			ENSGALG00000031496	7.66592
			ENSGALG00000033591	2.76448
			ENSGALG00000011594	2.79766
			ENSGALG00000009904	Inf
			ENSGALG00000050075	3.65046
			ENSGALG00000045085	2.63686
			ENSGALG00000010386	38.4006
			ENSGALG00000030960	3.81144
			ENSGALG00000032352	Inf
